# Supplementary material for: Accelerated resolution of inflammation underlies sex differences in inflammatory responses in humans
Source: PubMed Central journal article supplement (PMC5199722; doi:10.1172/jci89429), 2016-11-28

## Supplementary Information

**Accelerated resolution of inflammation underlies sex differences in inflammatory responses in humans**

**Krishnaraj S. Rathod, Vikas Kapil, Shanti Velmurugan, Rayomand S. Khambata, Umme Siddique, Saima Khan, Sven Van Eijl,, Jascharanpreet Bansal, Kavi Pitrola, Christopher Shaw, Romain A. Collas, Federica Marelli-Berg, Jesmond Dalli, Amrita Ahluwalia \***

**\* Corresponding author:**

**Professor Amrita Ahluwalia  
Prof of Vascular Pharmacology  
Barts & The London Medical School  
Queen Mary University of London  
Charterhouse Square,  
London, EC1M 6BQ  
Email: a.ahluwalia@qmul.ac.uk  
Tel: +44 207 882 8377  
Fax: +44 207 882 5619**

## Supplementary Tables

**Table S1**

The effect of typhoid on the expression of platelet activation markers and platelet activity in healthy volunteers. Data are shown for % P-selectin expression in males and females following PBS treatment and in response to ADP (3 and 10  $\mu$ M) or collagen (3 and 10  $\mu$ g/ml) at baseline, 8 hours and 32 hours post vaccine. For % platelet monocyte aggregates levels were measured at baseline, 8 hours and 32 hours post-vaccine. Data are shown as mean  $\pm$  s.e.mean and statistical analysis conducted using two-way ANOVA to determine the influence of sex for n=10 male and n=12 female volunteers ( 2 samples lost due to technical difficulties). Statistical significance was tested using two-way ANOVA with Sidak's post-hoc analysis.

|                                  | Males          |                |                | Females        |                |                | Sex comparison<br>P Value |
|----------------------------------|----------------|----------------|----------------|----------------|----------------|----------------|---------------------------|
|                                  | Baseline       | 8 hours        | 32 hours       | Baseline       | 8 hours        | 32 hours       |                           |
| <b>% P-Selectin expression</b>   |                |                |                |                |                |                |                           |
| PBS                              | 2.3 $\pm$ 1.4  | 0.7 $\pm$ 0.2  | 2.2 $\pm$ 1.2  | 1.0 $\pm$ 0.2  | 0.5 $\pm$ 0.1  | 0.8 $\pm$ 0.3  | 0.517                     |
| Collagen 1 $\mu$ g/ml            | 2.2 $\pm$ 0.7  | 1.3 $\pm$ 0.3  | 2.6 $\pm$ 1.1  | 2.3 $\pm$ 0.7  | 1.1 $\pm$ 0.2  | 1.2 $\pm$ 0.2  | 0.567                     |
| Collagen 3 $\mu$ g/ml            | 3.7 $\pm$ 0.9  | 3.2 $\pm$ 0.8  | 4.2 $\pm$ 1.6  | 3.8 $\pm$ 1.3  | 2.7 $\pm$ 0.6  | 2.2 $\pm$ 0.4  | 0.448                     |
| ADP 3 $\mu$ M                    | 9.1 $\pm$ 2.6  | 6.8 $\pm$ 1.3  | 4.2 $\pm$ 1.6  | 8.9 $\pm$ 2.1  | 12.3 $\pm$ 3.7 | 10.8 $\pm$ 3.3 | 0.723                     |
| ADP 10 $\mu$ M                   | 10.9 $\pm$ 3.3 | 7.1 $\pm$ 1.8  | 12.5 $\pm$ 3.3 | 12.0 $\pm$ 2.5 | 12.9 $\pm$ 3.0 | 13.8 $\pm$ 3.6 | 0.587                     |
| <b>% PMA expression</b>          |                |                |                |                |                |                |                           |
|                                  | 31.5 $\pm$ 4.2 | 34.2 $\pm$ 6.4 | 26.8 $\pm$ 4.3 | 27.8 $\pm$ 5.4 | 34.4 $\pm$ 6.0 | 33.1 $\pm$ 4.7 | 0.611                     |
| <b>Platelet Aggregation (AU)</b> |                |                |                |                |                |                |                           |
| PBS                              | 7.2 $\pm$ 2.1  | 8.8 $\pm$ 3.0  | 8.2 $\pm$ 2.3  | 9.2 $\pm$ 2.0  | 13.5 $\pm$ 2.5 | 8.1 $\pm$ 2.3  | 0.268                     |
| Collagen 1 $\mu$ g/ml            | 59.5 $\pm$ 3.4 | 61.6 $\pm$ 5.2 | 54.8 $\pm$ 4.0 | 60.2 $\pm$ 5.3 | 74.6 $\pm$ 5.1 | 61.3 $\pm$ 5.2 | 0.086                     |
| Collagen 3 $\mu$ g/ml            | 78.9 $\pm$ 3.7 | 91.5 $\pm$ 4.9 | 75.1 $\pm$ 3.9 | 83.8 $\pm$ 5.9 | 99.6 $\pm$ 5.9 | 76.8 $\pm$ 6.5 | 0.245                     |
| ADP 3 $\mu$ M                    | 35.1 $\pm$ 4.1 | 37.8 $\pm$ 4.1 | 37.7 $\pm$ 5.4 | 46.3 $\pm$ 5.8 | 54.4 $\pm$ 5.1 | 43.2 $\pm$ 5.5 | 0.008                     |
| ADP 10 $\mu$ M                   | 47.8 $\pm$ 4.1 | 49.9 $\pm$ 4.3 | 43.9 $\pm$ 3.7 | 57.0 $\pm$ 4.4 | 68.6 $\pm$ 3.5 | 56.9 $\pm$ 4.8 | 0.0002                    |

**Table S2**

**Vascular measures at baseline and at 8 and 32 hours following typhoid vaccination** Data are shown as mean  $\pm$  SD with statistical significance determined using two-way ANOVA with post-hoc Sidak's tests shown as \* for P<0.05, \*\*P <0.01, \*\*\*P <0.001, \*\*\*\*P <0.0001 for comparison of time-points between the sexes and no significant differences for within group comparisons to baseline.

|                                       | Males (n=12)     |                   |                 | Females (n=12) |                |                | Sex<br>comparison |
|---------------------------------------|------------------|-------------------|-----------------|----------------|----------------|----------------|-------------------|
|                                       | Baseline         | 8 hours           | 32 hours        | Baseline       | 8 hours        | 32 hours       |                   |
| <b>Ultrasound</b>                     |                  |                   |                 |                |                |                |                   |
| Baseline brachial artery diameter, mm | 3.8 $\pm$ 0.5*** | 3.8 $\pm$ 0.5**** | 3.8 $\pm$ 0.4** | 3.1 $\pm$ 0.3  | 3.1 $\pm$ 0.4  | 3.2 $\pm$ 0.4  | <0.0001           |
| Time to peak diameter, min            | 6.7 $\pm$ 0.5    | 6.7 $\pm$ 0.7     | 6.7 $\pm$ 0.8   | 6.7 $\pm$ 0.2  | 6.8 $\pm$ 0.2  | 6.8 $\pm$ 0.2  | 0.492             |
| <b>PWA</b>                            |                  |                   |                 |                |                |                |                   |
| Augmentation index, %                 | 13.3 $\pm$ 1.9   | 13.8 $\pm$ 1.2    | 13.5 $\pm$ 1.7* | 12.1 $\pm$ 1.4 | 11.6 $\pm$ 2.2 | 11.9 $\pm$ 1.9 | 0.24              |
| PWV, m/s                              | 6.7 $\pm$ 0.1    | 6.7 $\pm$ 0.1     | 6.7 $\pm$ 0.2*  | 6.3 $\pm$ 0.1  | 6.2 $\pm$ 0.2  | 6.2 $\pm$ 0.1  | <0.0001           |

**Table S3**

Blood differentials and CRP levels in male and female healthy volunteers at baseline and post cantharidin-induced blister harvest. Data are shown as mean  $\pm$  SD with statistical significance determined using two-way ANOVA with post-hoc Sidak's tests (note there were no significant differences between the sexes or on the effects of cantharidin on circulating markers or within sex).

|                |              | Hb (g/dL)      | Platelet count<br>( $\times 10^9/L$ ) | WBC<br>( $\times 10^{11}/L$ ) | Neutrophils<br>( $\times 10^9/L$ ) | Lymphocytes<br>( $\times 10^9/L$ ) | Monocytes<br>( $\times 10^9/L$ ) | CRP<br>(mg/L) |
|----------------|--------------|----------------|---------------------------------------|-------------------------------|------------------------------------|------------------------------------|----------------------------------|---------------|
| Male           | Baseline     | 15.0 $\pm$ 0.3 | 234.7 $\pm$ 15.2                      | 5.4 $\pm$ 0.3                 | 3.0 $\pm$ 0.3                      | 1.8 $\pm$ 0.1                      | 0.4 $\pm$ 0.04                   | <5            |
|                | Post-blister | 15.0 $\pm$ 0.3 | 242.2 $\pm$ 12.9                      | 5.6 $\pm$ 0.4                 | 3.2 $\pm$ 0.3                      | 1.8 $\pm$ 0.1                      | 0.4 $\pm$ 0.04                   | <5            |
| Female         | Baseline     | 13.1 $\pm$ 0.3 | 258.0 $\pm$ 12.0                      | 6.3 $\pm$ 0.5                 | 3.8 $\pm$ 0.4                      | 1.9 $\pm$ 0.1                      | 0.4 $\pm$ 0.02                   | <5            |
|                | Post-blister | 12.7 $\pm$ 0.2 | 259.9 $\pm$ 12.2                      | 6.0 $\pm$ 0.3                 | 3.3 $\pm$ 0.2                      | 2.0 $\pm$ 0.1                      | 0.4 $\pm$ 0.02                   | <5            |
| Sex Comparison |              | <0.0001        | 0.123                                 | 0.109                         | 0.133                              | 0.133                              | 0.859                            | 0             |

**Table S4** Cytokine/chemokine array of 24 hour cantharidin-induced blister supernatants in male and female healthy volunteers. Data are shown as mean  $\pm$  SD with statistical significance determined using two-way ANOVA with post-hoc Sidak's tests shown as \*\* for P < 0.01 for comparison of time-points between the sexes and no significant differences for within group comparisons to baseline.

|                |      | IL-6 (pg/ml)    | IL-10 (pg/ml)   | CCL-5<br>(pg/ml) | CXCL-1 (pg/ml)    | IL-8 (pg/ml)       | MCP-1<br>(pg/ml)  |
|----------------|------|-----------------|-----------------|------------------|-------------------|--------------------|-------------------|
| Male           | 24 h | 4361 $\pm$ 1182 | 6.6 $\pm$ 2.3   | 11.5 $\pm$ 1.8   | 1046 $\pm$ 606.6  | 5716 $\pm$ 1453    | 6139 $\pm$ 2141   |
|                | 72 h | 3250 $\pm$ 1178 | 48.1 $\pm$ 26.7 | 38.5 $\pm$ 26.0  | 224.5 $\pm$ 36.0  | 3675 $\pm$ 563.8   | 224.4 $\pm$ 26.86 |
| Female         | 24 h | 5087 $\pm$ 1697 | 18.0 $\pm$ 7.3  | 15.5 $\pm$ 2.7   | 4224 $\pm$ 1809   | 13383 $\pm$ 2771** | 9658 $\pm$ 3113   |
|                | 72 h | 5240 $\pm$ 3007 | 30.6 $\pm$ 0.0  | 10.7 $\pm$ 0     | 380.4 $\pm$ 124.3 | 5511 $\pm$ 9376    | 302.6 $\pm$ 93.2  |
| Sex comparison |      | 0.452           | 0.653           | 0.375            | 0.221             | 0.0484             | 0.527             |

**Table S5** Blister exudate LM-SPM profiles. Exudates were collected from male (n=13) and female volunteers (n=11) 24h after cantharidin application and supernatants were profiling using LC-MS/MS based profiling. Results are mean  $\pm$  s.e.m. with statistical significance determined using Student's 2-tailed unpaired t-test. - = below limit, limit  $\approx$  0.1 pg

| DHA bioactive metabolome            | Q1  | Q3  | Lipid mediators levels (pg/50 $\mu$ L) |                   |            |                  | p value      |
|-------------------------------------|-----|-----|----------------------------------------|-------------------|------------|------------------|--------------|
|                                     |     |     | Female                                 |                   | Male       |                  |              |
| RvD1                                | 375 | 215 | 1.6                                    | $\pm$ 1.1         | 1.4        | $\pm$ 0.8        | 0.317        |
| RvD2                                | 375 | 215 | 0.4                                    | $\pm$ 0.7         | 0.1        | $\pm$ 0.3        | 0.120        |
| RvD3                                | 375 | 147 | 0.0                                    | $\pm$ 0.1         | -          |                  | 0.143        |
| RvD4                                | 375 | 101 | -                                      |                   | -          |                  |              |
| RvD5                                | 359 | 199 | 0.3                                    | $\pm$ 0.3         | 0.5        | $\pm$ 0.5        | 0.176        |
| RvD6                                | 359 | 159 | -                                      |                   | -          |                  |              |
| 17R-RvD1                            | 375 | 215 | 1.8                                    | $\pm$ 1.7         | 0.8        | $\pm$ 0.9        | 0.051        |
| 17R-RvD3                            | 375 | 147 | 0.0                                    | $\pm$ 0.1         | 0.1        | $\pm$ 0.1        | 0.246        |
| PD1                                 | 359 | 153 | <b>0.3</b>                             | $\pm$ <b>0.6</b>  | -          |                  | <b>0.046</b> |
| 10S,17S-diHDHA (PDX)                | 359 | 153 | 0.7                                    | $\pm$ 0.6         | 0.8        | $\pm$ 0.9        | 0.463        |
| MaR1                                | 359 | 250 | 2.5                                    | $\pm$ 6.4         | 0.9        | $\pm$ 1.7        | 0.195        |
| 7S,14S-diHDHA                       | 359 | 221 | 0.1                                    | $\pm$ 0.3         | 0.3        | $\pm$ 0.7        | 0.201        |
| 17-HDHA                             | 343 | 245 | 22.7                                   | $\pm$ 17.5        | 242.6      | $\pm$ 589.5      | 0.115        |
| 14-HDHA                             | 343 | 205 | 194.2                                  | $\pm$ 108.2       | 163.8      | $\pm$ 120.4      | 0.263        |
| 7-HDHA                              | 343 | 141 | 2.7                                    | $\pm$ 1.6         | 3.2        | $\pm$ 2.7        | 0.282        |
| 4-HDHA                              | 343 | 101 | 3.6                                    | $\pm$ 1.7         | 4.6        | $\pm$ 4.8        | 0.264        |
| DHA                                 | 327 | 283 | 3031.3                                 | $\pm$ 1309.2      | 2789.6     | $\pm$ 1334.4     | 0.33         |
| <b>EPA bioactive metabolome</b>     |     |     |                                        |                   |            |                  |              |
| RvE1                                | 349 | 161 | 0.4                                    | $\pm$ 1.0         | 0.4        | $\pm$ 0.6        | 0.403        |
| RvE2                                | 333 | 199 | 1.0                                    | $\pm$ 1.1         | 0.8        | $\pm$ 1.2        | 0.344        |
| RvE3                                | 333 | 245 | 4.0                                    | $\pm$ 6.6         | 1.6        | $\pm$ 3.1        | 0.125        |
| 18-HEPE                             | 317 | 259 | 2.1                                    | $\pm$ 4.8         | 4.0        | $\pm$ 9.6        | 0.288        |
| 15-HEPE                             | 317 | 219 | 7.9                                    | $\pm$ 11.3        | 101.7      | $\pm$ 227.7      | 0.094        |
| 12-HEPE                             | 317 | 179 | 20.1                                   | $\pm$ 52.2        | 27.3       | $\pm$ 70.8       | 0.390        |
| 5-HEPE                              | 317 | 115 | 0.4                                    | $\pm$ 1.2         | 1.6        | $\pm$ 4.9        | 0.23.2       |
| EPA                                 | 301 | 257 | 975.5                                  | $\pm$ 622.1       | 1231.0     | $\pm$ 857.7      | 0.210        |
| <b>AA bioactive metabolome</b>      |     |     |                                        |                   |            |                  |              |
| LXA <sub>4</sub>                    | 351 | 115 | -                                      |                   | -          |                  |              |
| LXB <sub>4</sub>                    | 351 | 221 | 5.4                                    | $\pm$ 3.6         | 3.5        | $\pm$ 2.0        | 0.062        |
| 5S,15S-diHETE                       | 335 | 115 | 15.0                                   | $\pm$ 19.6        | 9.9        | $\pm$ 6.6        | 0.193        |
| AT-LXA <sub>4</sub>                 | 351 | 115 | 0.2                                    | $\pm$ 0.3         | 0.2        | $\pm$ 0.3        | 0.493        |
| AT-LXB <sub>4</sub>                 | 351 | 221 | 0.6                                    | $\pm$ 1.2         | 0.3        | $\pm$ 0.5        | 0.198        |
| LTB <sub>4</sub>                    | 335 | 195 | <b>0.6</b>                             | $\pm$ <b>0.3</b>  | <b>1.2</b> | $\pm$ <b>1.0</b> | <b>0.037</b> |
| PGD <sub>2</sub>                    | 351 | 189 | <b>16.2</b>                            | $\pm$ <b>12.9</b> | <b>8.9</b> | $\pm$ <b>4.0</b> | <b>0.032</b> |
| PGE <sub>2</sub>                    | 351 | 189 | 228.1                                  | $\pm$ 205.6       | 134.9      | $\pm$ 72.2       | 0.070        |
| PGF <sub>2<math>\alpha</math></sub> | 353 | 193 | 1116.6                                 | $\pm$ 550.0       | 808.9      | $\pm$ 468.2      | 0.076        |
| TxB <sub>2</sub>                    | 369 | 169 | 805.2                                  | $\pm$ 796.4       | 426.8      | $\pm$ 559.6      | 0.093        |
| 20-HETE                             | 319 | 301 | 15.5                                   | $\pm$ 11.9        | 19.9       | $\pm$ 17.8       | 0.246        |
| 15-HETE                             | 319 | 219 | 144.8                                  | $\pm$ 211.0       | 848.2      | $\pm$ 1605.3     | 0.082        |
| 12-HETE                             | 319 | 179 | 551.2                                  | $\pm$ 223.4       | 514.5      | $\pm$ 311.8      | 0.374        |
| 5-HETE                              | 319 | 115 | 9.3                                    | $\pm$ 5.3         | 13.3       | $\pm$ 8.6        | 0.098        |
| AA                                  | 303 | 259 | 4320.9                                 | $\pm$ 1980.6      | 4714.8     | $\pm$ 2041.8     | 0.319        |

**Table S6 Lipid mediator profiles in plasma from male or female volunteers following typhoid vaccination** Plasma was collected and LM levels were assessed using LM-profiling. Results are expressed as pg/mL; mean  $\pm$  s.e.m. ; n = 4 volunteers per group. - = below limit, limit  $\approx$  0.1 pg

| DHA bioactive metabolome            | Q1  | Q3  | Lipid mediators levels (pg/mL)  |                                 | p value      |
|-------------------------------------|-----|-----|---------------------------------|---------------------------------|--------------|
|                                     |     |     | Male                            | Female                          |              |
| RvD1                                | 375 | 233 | 0.1 $\pm$ 0.0                   | 0.1 $\pm$ 0.0                   | 0.280        |
| RvD2                                | 375 | 141 | 0.3 $\pm$ 0.1                   | 0.4 $\pm$ 0.2                   | 0.312        |
| RvD3                                | 375 | 147 | 0.2 $\pm$ 0.1                   | 0.1 $\pm$ 0.0                   | 0.187        |
| RvD4                                | 375 | 101 | 0.5 $\pm$ 0.5                   | 0.1 $\pm$ 0.1                   | 0.230        |
| RvD5                                | 359 | 199 | 1.2 $\pm$ 0.2                   | 2.0 $\pm$ 0.7                   | 0.152        |
| RvD6                                | 359 | 101 | 0.3 $\pm$ 0.1                   | 0.2 $\pm$ 0.1                   | 0.340        |
| 17R-RvD1                            | 375 | 141 | 0.1 $\pm$ 0.0                   | 0.1 $\pm$ 0.1                   | 0.312        |
| 17R-RvD3                            | 375 | 147 | 0.2 $\pm$ 0.1                   | 0.1 $\pm$ 0.0                   | 0.187        |
|                                     |     |     |                                 |                                 |              |
| PD1                                 | 359 | 153 | 0.2 $\pm$ 0.0                   | 0.2 $\pm$ 0.1                   | 0.296        |
| 17R-PD1                             | 359 | 153 | 0.2 $\pm$ 0.1                   | 0.1 $\pm$ 0.1                   | 0.329        |
| 22-OH-PD1                           | 375 | 153 | 0.4 $\pm$ 0.4                   | 0.7 $\pm$ 0.7                   | 0.343        |
| 10S,17S-diHDHA (PDX)                | 359 | 153 | 0.6 $\pm$ 0.0                   | 0.9 $\pm$ 0.3                   | 0.098        |
|                                     |     |     |                                 |                                 |              |
| MaR1                                | 359 | 221 | -                               | -                               |              |
| MaR2                                | 359 | 191 | 2.9 $\pm$ 1.3                   | 2.5 $\pm$ 1.0                   | 0.395        |
| 22-OH-MaR1                          | 375 | 221 | 0.4 $\pm$ 0.4                   | 0.1 $\pm$ 0.2                   | 0.247        |
| 7S,14S-diHDHA                       | 359 | 221 | -                               | -                               | 0.232        |
| 4S,14S-diHDHA                       | 359 | 101 | 0.3 $\pm$ 0.3                   | 0.1 $\pm$ 0.1                   | 0.178        |
|                                     |     |     |                                 |                                 |              |
| <b>EPA bioactive metabolome</b>     |     |     |                                 |                                 |              |
| RvE1                                | 349 | 161 | 0.2 $\pm$ 0.1                   | 0.4 $\pm$ 0.1                   | 0.118        |
| RvE2                                | 333 | 159 | 0.1 $\pm$ 0.1                   | -                               | 0.369        |
| RvE3                                | 333 | 201 | 0.4 $\pm$ 0.2                   | 0.9 $\pm$ 0.4                   | 0.094        |
|                                     |     |     |                                 |                                 |              |
| <b>AA bioactive metabolome</b>      |     |     |                                 |                                 |              |
| LXA <sub>4</sub>                    | 351 | 217 | 0.1 $\pm$ 0.0                   | 0.1 $\pm$ 0.0                   | 0.298        |
| LXB <sub>4</sub>                    | 351 | 221 | <b>5.2 <math>\pm</math> 2.6</b> | -                               | <b>0.028</b> |
| 5S,15S-diHETE                       | 335 | 235 | 4.9 $\pm$ 2.6                   | 1.1 $\pm$ 0.8                   | 0.082        |
| AT-LXA <sub>4</sub>                 | 351 | 217 | 0.2 $\pm$ 0.2                   | 0.1 $\pm$ 0.1                   | 0.317        |
| AT-LXB <sub>4</sub>                 | 351 | 221 | 1.1 $\pm$ 0.6                   | 1.2 $\pm$ 0.8                   | 0.440        |
|                                     |     |     |                                 |                                 |              |
| LTB <sub>4</sub>                    | 335 | 195 | <b>0.6 <math>\pm</math> 0.0</b> | <b>0.5 <math>\pm</math> 0.0</b> | <b>0.006</b> |
| 6-trans- LTB <sub>4</sub>           | 335 | 195 | 0.1 $\pm$ 0.0                   | -                               | 0.168        |
| 12-epi-6-trans- LTB <sub>4</sub>    | 335 | 195 | 0.2 $\pm$ 0.1                   | -                               | 0.099        |
| 5S,12S-diHETE                       | 335 | 195 | 0.1 $\pm$ 0.0                   | 0.1 $\pm$ 0.0                   | 0.414        |
| 20-OH-LTB <sub>4</sub>              | 351 | 195 | 0.1 $\pm$ 0.0                   | -                               | 0.085        |
|                                     |     |     |                                 |                                 |              |
| PGD <sub>2</sub>                    | 351 | 189 | 3.5 $\pm$ 1.8                   | 4.4 $\pm$ 2.6                   | 0.382        |
| PGE <sub>2</sub>                    | 351 | 189 | 5.7 $\pm$ 2.4                   | 6.9 $\pm$ 3.7                   | 0.379        |
| PGF <sub>2<math>\alpha</math></sub> | 353 | 193 | 3.8 $\pm$ 1.0                   | 6.0 $\pm$ 3.0                   | 0.220        |
| TxB <sub>2</sub>                    | 369 | 169 | 97.8 $\pm$ 36.3                 | 108.7 $\pm$ 52.7                | 0.426        |

## Supplementary Figures

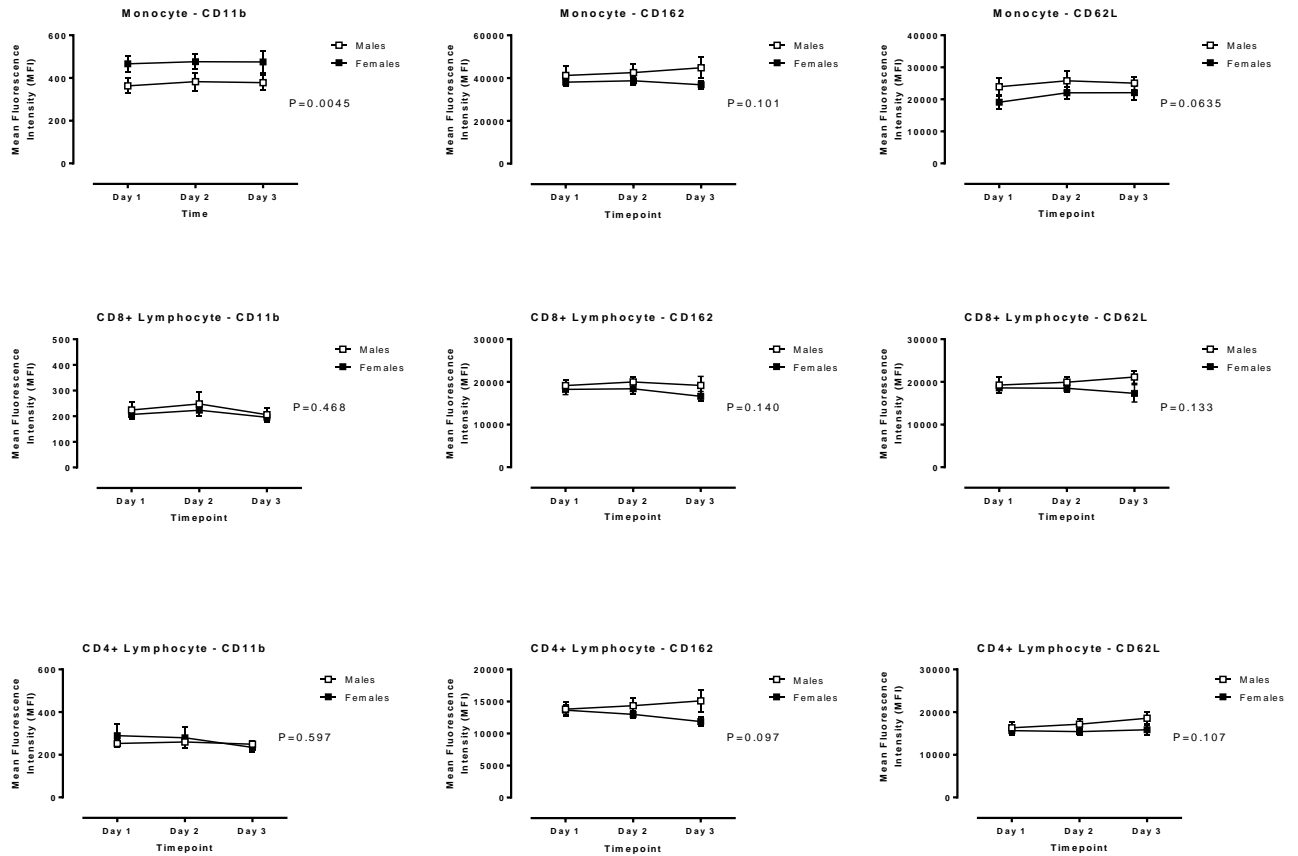

**Figure S1 – Changes in expression of CD11b, CD62L and CD162 on monocytes, CD4+ and CD8+ lymphocytes in male and female healthy volunteers measured at baseline, 8 hours and 32 hours following typhoid vaccine.** Data expressed as mean  $\pm$  s.e.mean for n=12 for each sex for all the panels. Statistical significance determined using two-way ANOVA with Sidak's post-hoc analysis for all the panels. MFI = Median fluorescence intensity.

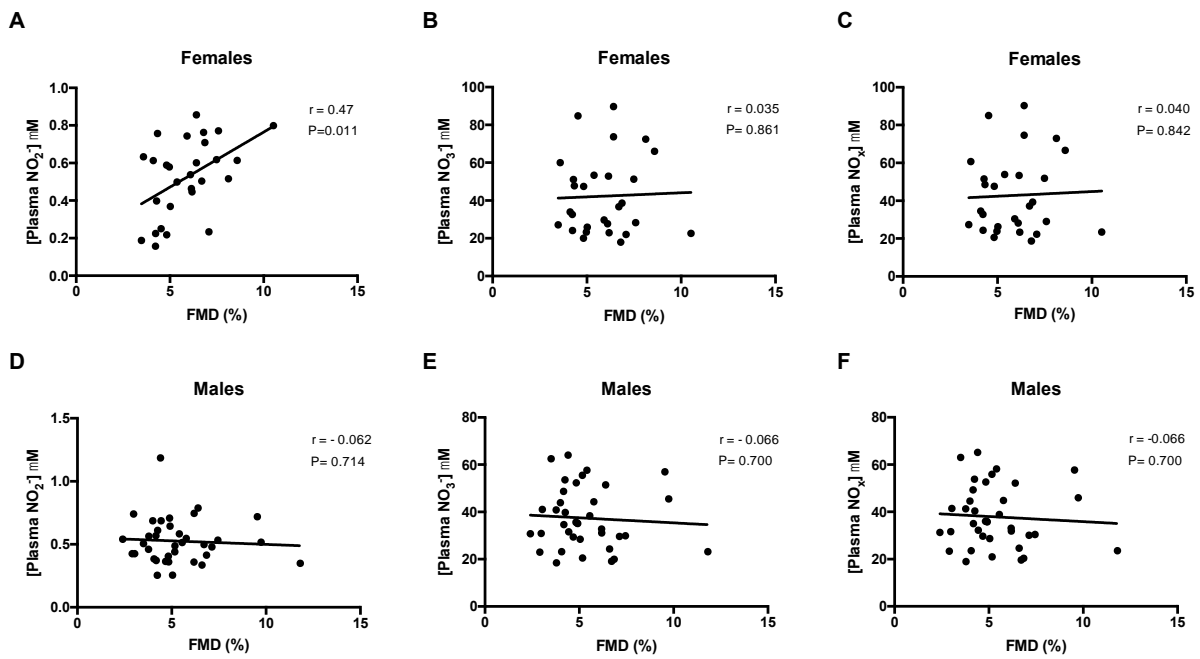

**Figure S2 Correlations between FMD responses in healthy volunteers and levels of plasma NO metabolites  $\text{NO}_2^-$ ,  $\text{NO}_3^-$  and  $\text{NO}_x$  in females (A-C) and males (D-F).** Data from pre-vaccine baseline and 8 and 32 hours post-vaccine are collated. All graphs show Pearson linear regression, and statistical significance of r-value for all the panels.

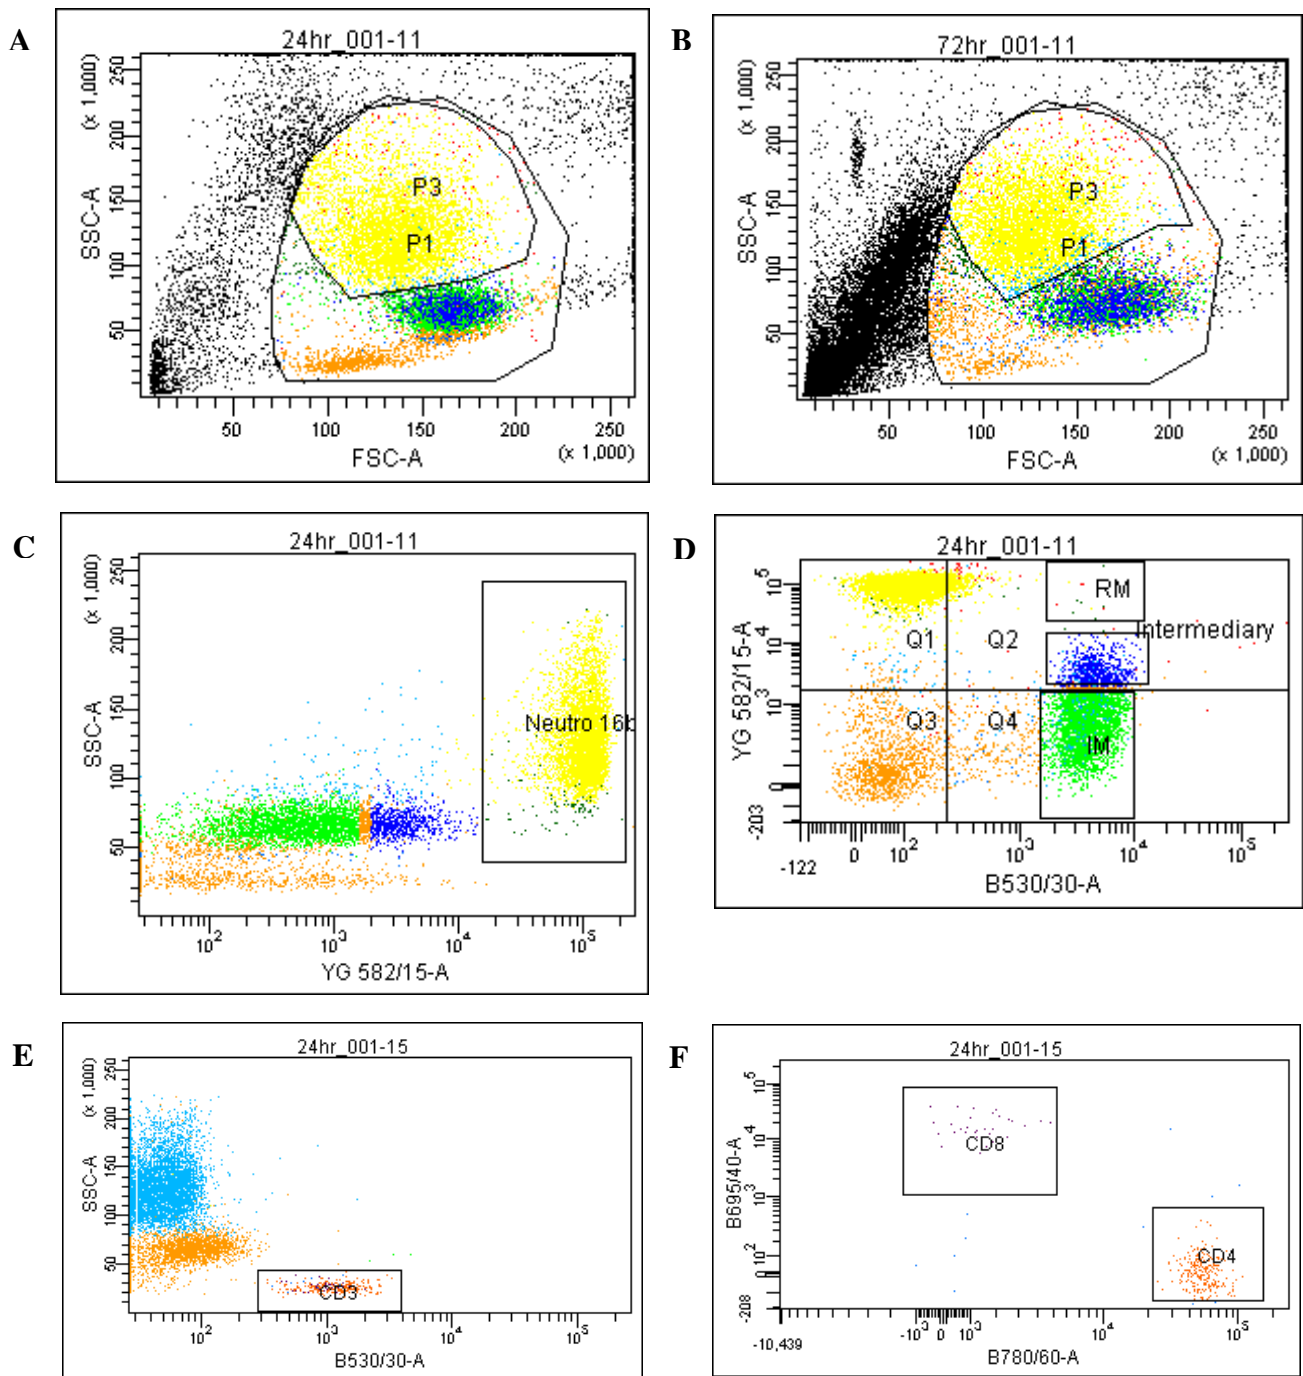

**Figure S3 – Representative dot plots to identify leucocyte sub-populations collected in cantharidin induced blister fluid in healthy volunteers: A-B)** Characteristic FSC/SSC dot plot from a 24hrs and 72hrs blister fluid respectively; **C)** Density dot plot of neutrophils (yellow-gated cells) confirmed by anti-CD16b+ binding; **D)** Density dot plot of monocytes showing presence of CD14+/CD16- classical inflammatory (IM) monocytes (green-gated), CD14+/CD16+ intermediate monocytes (blue-gated) and a fraction of CD14lo/CD16++ resident (RM) monocytes confirmed by appropriate binding patterns with anti-CD14 and/or anti-CD16; **E)** Density dot plot of lymphocytes (red-gated cells) confirmed by anti-CD3 binding and **F)** Density dot plot showing T-cell sub-types with anti-CD4+ (orange-gated cells) and anti-CD8+ (blue-gated cells) binding.



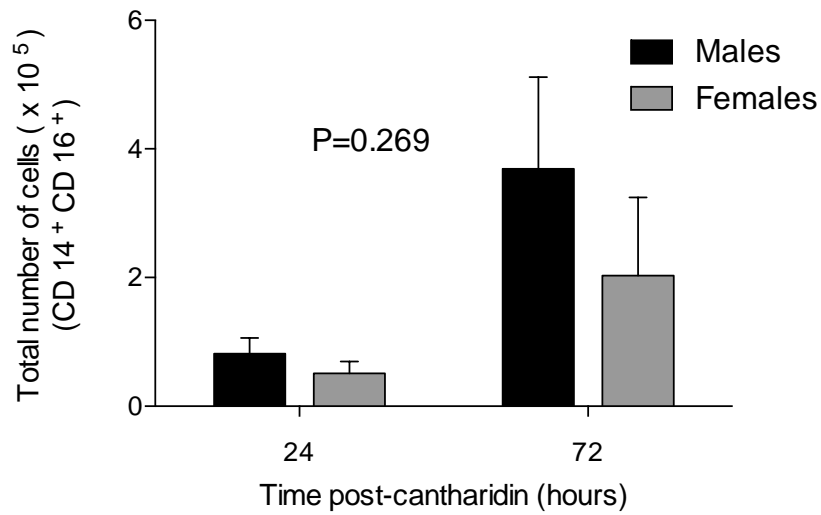

**Figure S4 – Intermediate Monocyte count in cantharidin-induced blister fluid at 24 hours and 72 hours post application in healthy volunteers** (male n=13-15, female n=14-16). Data shown as mean  $\pm$  s.e.mean with statistical significance determined using two-way ANOVA to compare between sexes on each day; not significant.

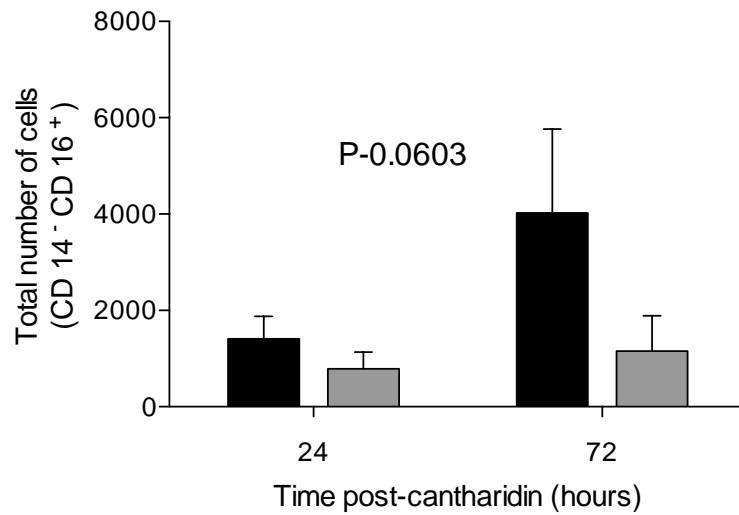

**Figure S5 – Resident Monocyte in cantharidin-induced blister fluid at 24 hours and 72 hours post application in healthy volunteers** (male n=13-15, female n=14-16). Data shown as mean  $\pm$  s.e.mean with statistical significance determined using two-way ANOVA to compare between sexes on each day; not significant.

**Figure S6. Distinct plasma LM-SPM profiles in males and females following typhoid vaccination.** Plasma was collected for healthy volunteers following typhoid vaccine administration and LM levels were assessed using LM-profiling (see methods for details). (A) *left panel* Representative Multiple Reaction Monitoring chromatograms for identified mediators. *a*= $\Delta$ 6-trans-LTB<sub>4</sub>, *b*=12-epi,  $\Delta$ 6-trans-LTB<sub>4</sub>. *right panel* MS-MS fragmentation and diagnostic ions employed for LXB<sub>4</sub> and RvE1 identification. m/z, mass-to-charge ratio; M-H, molecular ion. (B) *top panel* 2-dimensional score plot of human plasma LM-SPM profiles. *Bottom panel* 2-dimensional loading plot. Grey ellipse in the score plot denotes 95% confidence regions. Results are representative n=4 male and n=4 female healthy volunteers. (C-D) Cumulative levels for each of the bioactive LM families identified. Results are mean $\pm$ s.e.m n=4 volunteers per group. \* p<0.05 vs Male volunteer plasma values.

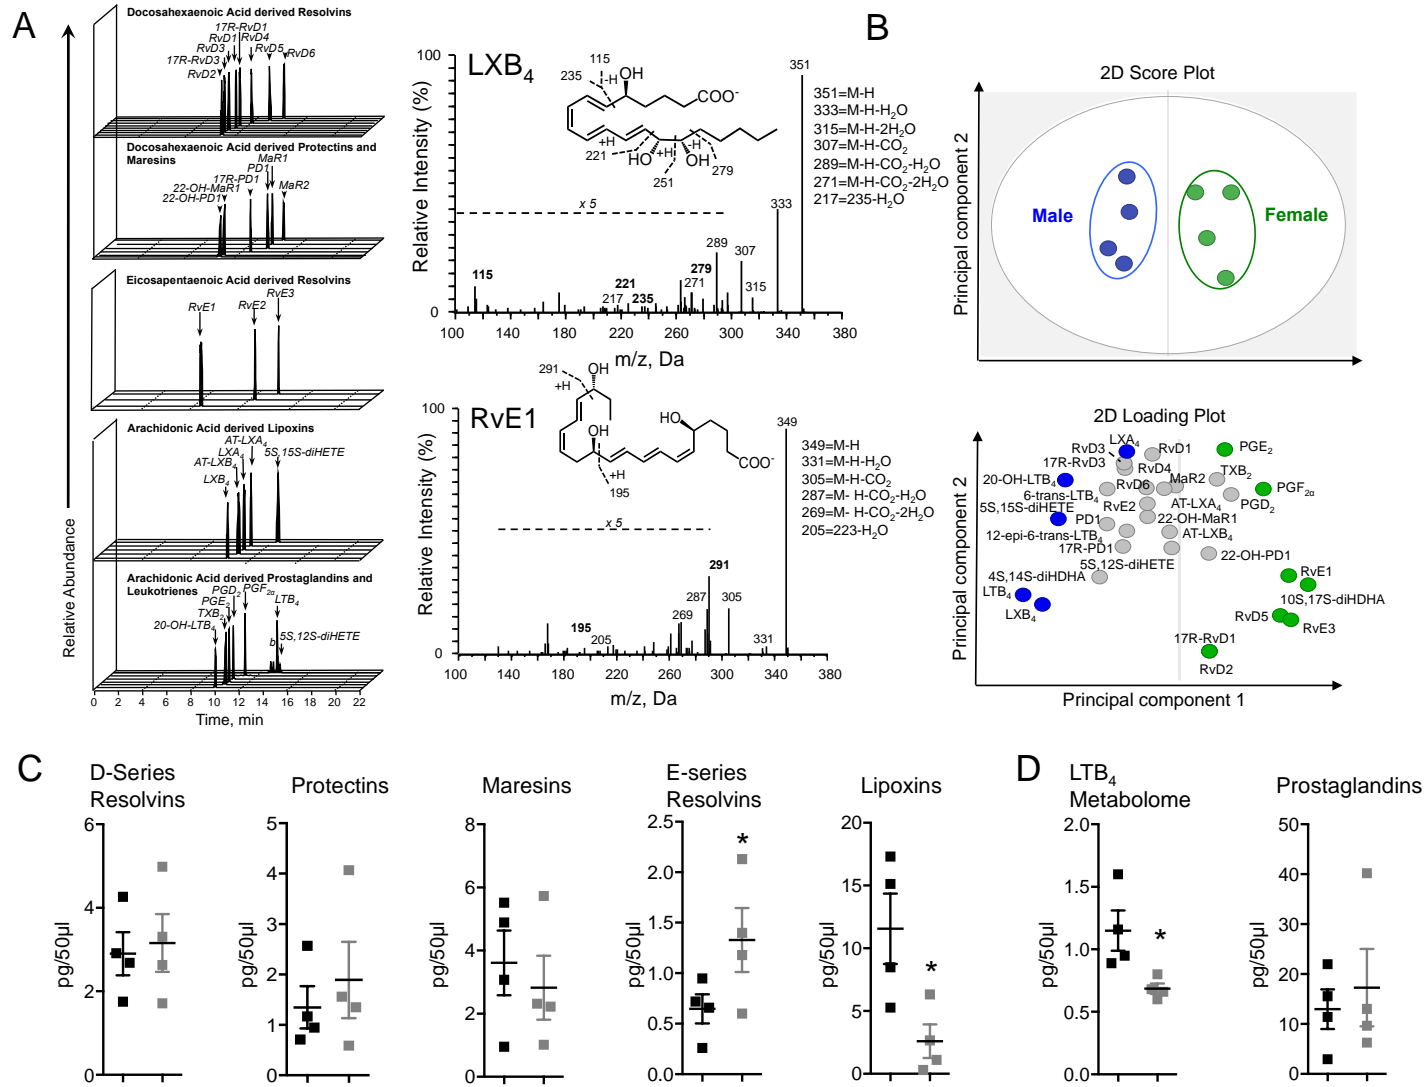

Supplement: jci-127-89429-s001.pdf [file jci-127-89429-s001.pdf]
